# Supplementary material for: Targeted bacterial conjugation mediated by synthetic cell-to-cell adhesions
Source: PubMed Central journal article supplement (PMC9825185; doi:10.1093/nar/gkac1164), 2022-12-13
Supplement: gkac1164_supplemental_file.pdf [file gkac1164_supplemental_file.pdf]

Supplementary Materials for

**Targeted bacterial conjugation mediated by synthetic cell-to-cell adhesions**

Marta Robledo<sup>1,2\*</sup>, Beatriz Álvarez<sup>3</sup>, Ana Cuevas<sup>1</sup>, Sheila González<sup>1</sup>, David Ruano-Gallego<sup>3</sup>, Luis Ángel Fernández<sup>3</sup> and Fernando de la Cruz<sup>1\*</sup>

<sup>1</sup>Intergenomics Group, Instituto de Biomedicina y Biotecnología de Cantabria, Universidad de Cantabria, Santander, Cantabria, 39011, Spain.

<sup>2</sup>Biomar Microbial Technologies, Parque Tecnológico de León, Armunia, León, 24009, Spain.

<sup>3</sup>Department of Microbial Biotechnology, Centro Nacional de Biotecnología, Consejo Superior de Investigaciones Científicas (CNB-CSIC), Campus UAM Cantoblanco, 28049, Madrid, Spain

\* To whom correspondence should be addressed. Email: [delacruz@unican.es](mailto:delacruz@unican.es)

Correspondence may also be addressed to [marta.robledo@unican.es](mailto:marta.robledo@unican.es)

**This PDF file includes:**

Supplementary Figures S1 to S9

Supplementary Tables S1 to S4

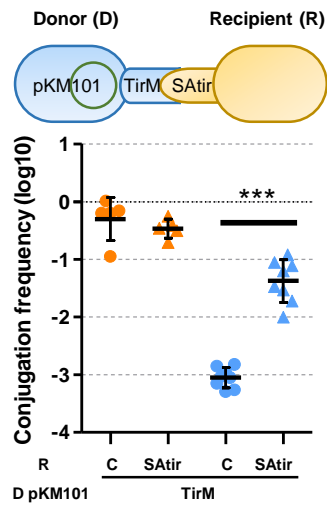

**Fig. S1. Synthetic adhesion increase conjugation frequencies in liquid media of conjugative plasmid pKM101.** Experimental scheme and conjugation frequencies (Transconjugants/Donor) of pKM101 shown in logarithmic scale after grown 2h in either solid or in liquid LB medium. Donor (D) bacteria were EcM1flu::TirMA, constitutively expressing TirM Ag on the bacterial surface. Recipient (R) cells were *E.coli* BW27783 carrying either pNVgfp (Control; C) or pNVtir1 (SATir). Each point represents the result of one independent experiment shown in logarithmic scale; horizontal and vertical bars represent the mean  $\pm$  SD of each group of data. \*\*\* $p < 0.001$ , by unpaired Student's t-test.

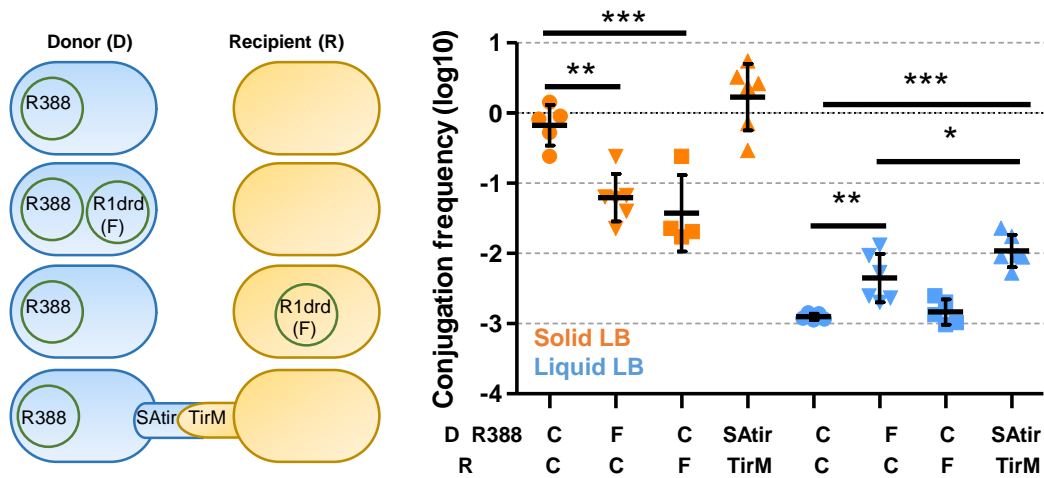

**Fig. S2. Synthetic adhesins are more efficient conjugation enhancers than IncF liquid-mating plasmids.** Conjugation schemes and frequencies (transconjugants/donor = T/D) of conjugative plasmid R388 shown in logarithmic scale after grown 2h in either solid or in liquid LB. Donor carried R388 alone (Control; C) or plus either the IncF liquid conjugator R1drd (F) or pNVtir (SAtir), as indicated. Recipient cells were either plasmid-free *E. coli* MG1655 EcM1 (Control; C), EcM1 carrying R1drd (F) or EcM1flu::TirMA (TirM), as depicted in the scheme. \*p < 0.05, \*\*p < 0.01, \*\*\*p < 0.001, by unpaired Student's t-test.

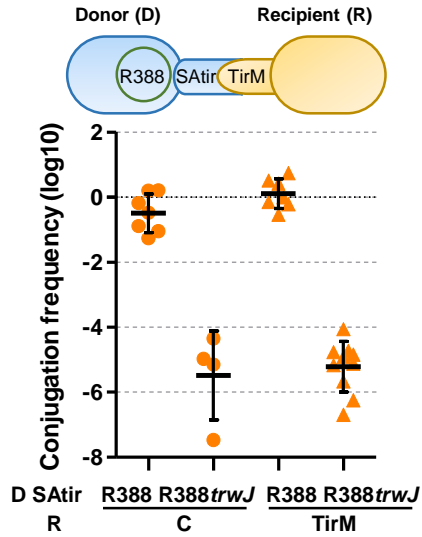

**Fig. S3. Synthetic adhesion does not complement lack of pili adhesin for conjugation.** Experimental scheme and conjugation frequencies (Transconjugants/Donor) of plasmids R388 and R388 *trwJ* shown in logarithmic scale after grown 2h in either solid or in liquid LB medium. Donor bacteria were *E. coli* BW27783 carrying either R388 or R388 *trwJ* derivative plus pNVtir1, expressing tir1 anti-TirM Nb. Recipient cells were either *E. coli* MG1655 EcM1 (Control; C) or EcM1flu::TirMA (TirM). Each point represents the result of one independent experiment shown in logarithmic scale; horizontal and vertical bars represent the mean  $\pm$  SD of each group of data.

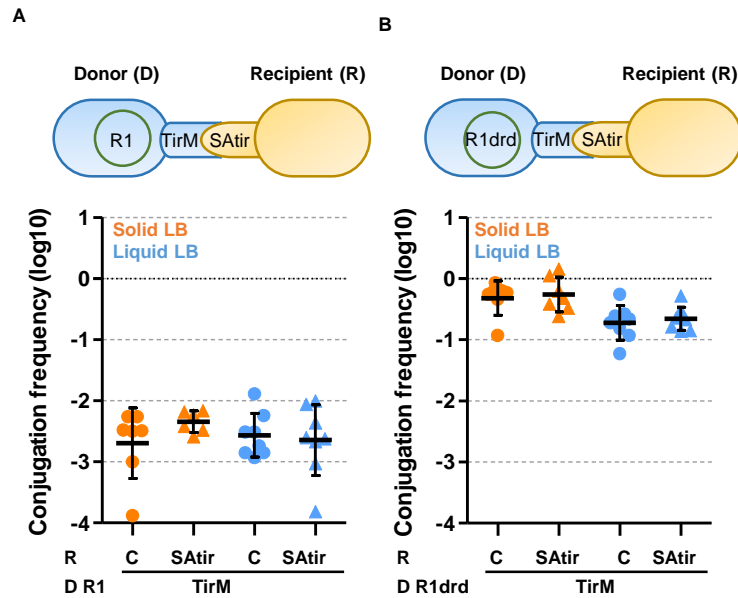

**Fig. S4. Synthetic adhesion of donor-to-recipient cells does not affect conjugation of liquid-mating plasmids.** Conjugation schemes and frequencies (transconjugants/donor = T/D) of low-frequency conjugative plasmid R1 **(A)** and high-frequency R1drd19 **(B)** shown in logarithmic scale after grown 2h in either solid or in liquid LB. Donor were EcM1flu::TirMA, constitutively expressing TirM peptide carrying the corresponding conjugative plasmid. Recipients carried either control pNVgpf (Control; C) or pNVtir1 (SAtir).

A

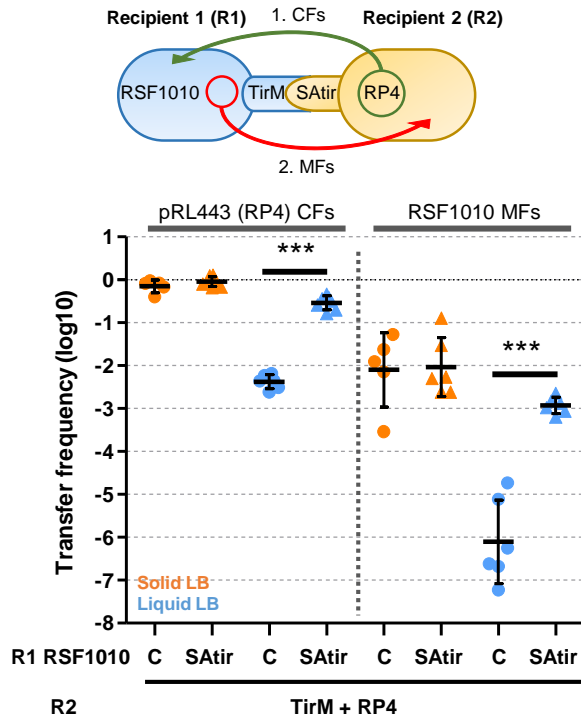

B

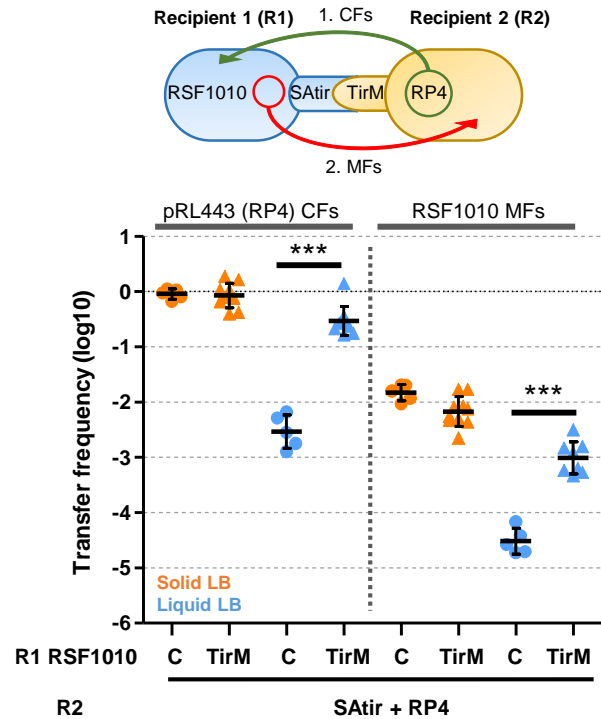

**Fig. S5. Synthetic adhesion increases RP4-mediated RSF1010 mobilization frequencies.** RP4 conjugation frequencies (CFs; transconjugants/recipient 1 T/R1) and RSF1010 mobilization frequencies (MFs; T/R2), in depicted matings shown in logarithmic scale after grown 2h in either solid (orange points) or liquid (blue) LB medium. **(A)** R1 bacteria were *E. coli* BW27783 carrying the mobilizable plasmid RSF1010 plus either control plasmid pHEA (Control; C) or pTirMA (TirM) expressing the TirM Ag. R2 cells were EcM1SATir, constitutively expressing the Nb (SATir) and carrying conjugative plasmid RP4. **(B)** R1 bacteria were *E. coli* BW27783 carrying the mobilizable plasmid RSF1010 plus either control plasmid pNVgfp (Control; C) or pNVtir1 (SATir). R2 cells were EcM1TirMA, constitutively expressing the Ag TirM and carrying conjugative plasmid RP4.

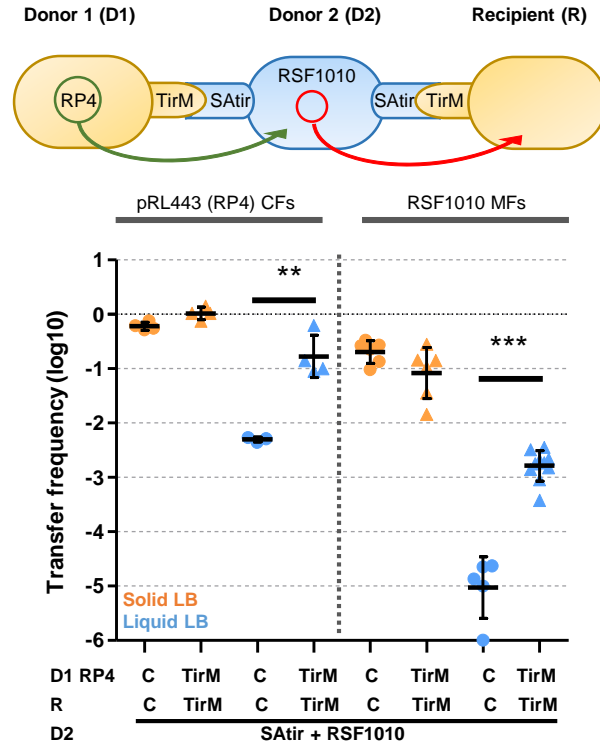

**Fig. S6. Synthetic adhesion enhances DNA transference in complex triparental mating schemes.** Triparental matings: Donor 1 (D1) and recipient (R) bacteria were *E. coli* BW27783 carrying either pHEA (Control; C) or pTirMA (TirM). Donor 2 (D2) cells were *E. coli* MG1655 EcM1SAtir expressing the tir Nb (SAtir) and carrying the mobilizable plasmid RSF1010. D1 cells also carried RP4 plasmid, which mobilizes RSF1010 upon conjugation to D2 cells. \*\* $p < 0.01$ , \*\*\* $p < 0.001$ , by unpaired Student's t-test.

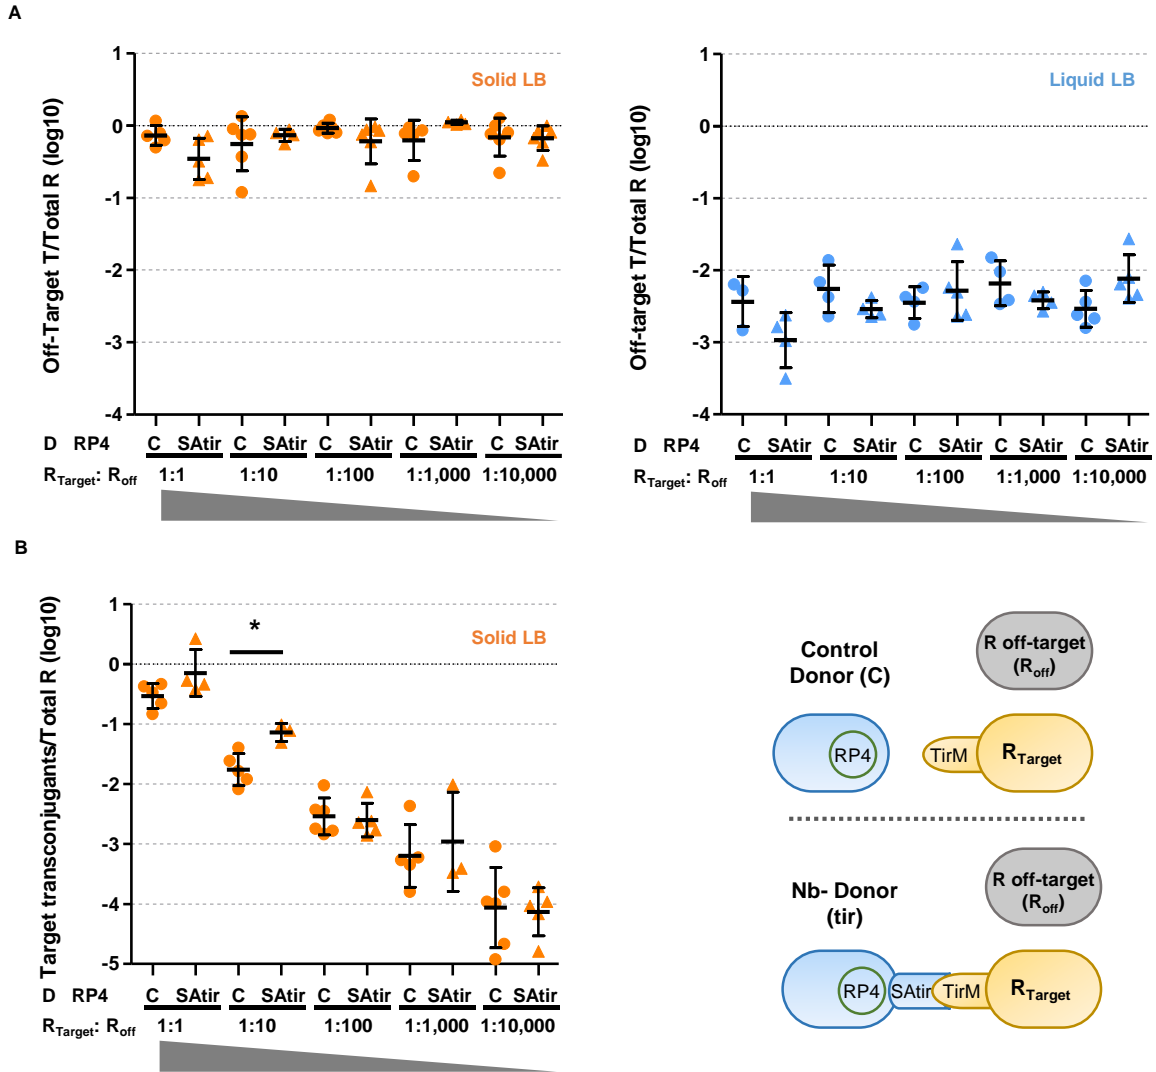

**Fig. S7. Conjugation to non-target (A) and target recipient cells in solid surfaces (B).** Conjugation frequencies of RP4 (IncP) expressed as log<sub>10</sub> of off-target (A) or target (B) transconjugants per total number of recipients after grown 2h in solid or liquid LB medium (target transconjugants per total number of recipients in liquid LB medium is shown in figure 5). Overview of the target conjugation control and experiments with compatible SATir/TirM expressing Donor and R<sub>target</sub> bacteria is also shown. Donor were *E. coli* BW27783 cells carrying plasmid RP4 and either pNVgpf (Control; C) or pNVtir1 (SATir), expressing the anti-TirM Nb upon induction with 0.1 mM IPTG. Recipient cells were a mixture of target EcM1flu::TirMA cells (R<sub>Target</sub>), constitutively expressing TirM peptide and non-target BWmKate cells (R off-target; R<sub>off</sub>). Donor, TirM target and control recipient cells were previously grown overnight without shaking and mixed at the indicated R<sub>Target</sub>:R<sub>off</sub> recipient ratios, decreasing the proportion of R<sub>Target</sub> cells (Donor and R<sub>off-target</sub> cells were always at a 1:1 proportion). \*p < 0.05, by unpaired Student's t-test.



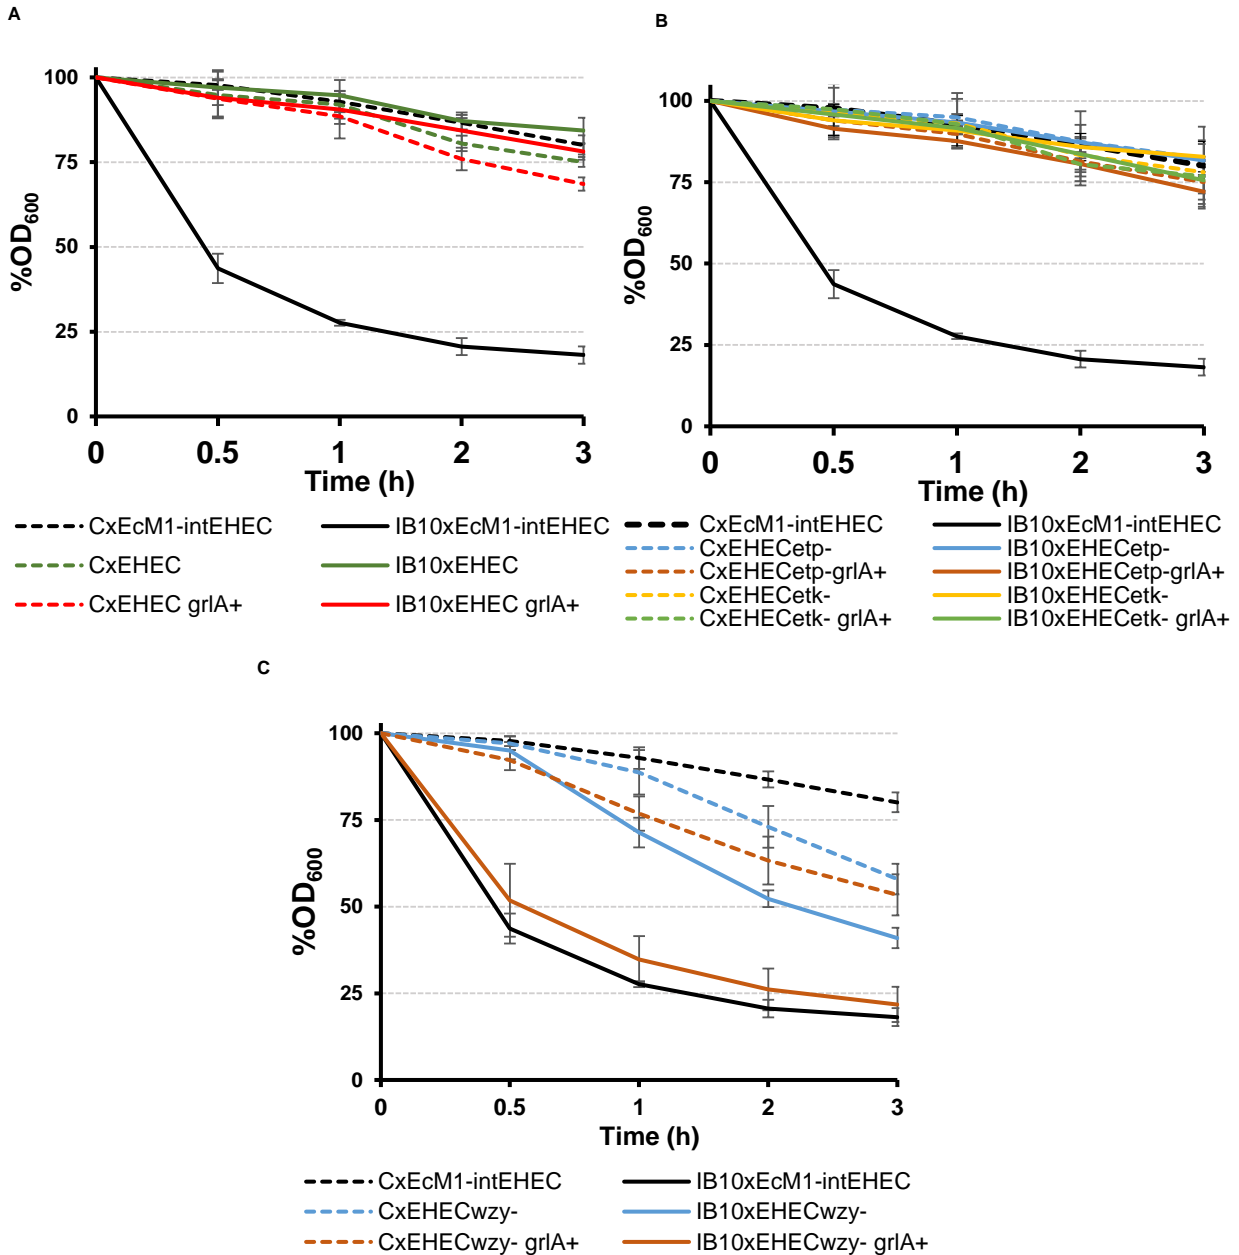

**Fig. S8. Mixtures of IB10-expressing cells and EHEC *wzy* *grIA*<sup>+</sup> aggregated to a similar extent than with EcM1-NL-intEHEC.** Shown is relative OD<sub>600</sub> at different time points of cells remaining at upper part of liquid matings. *E. coli* BW27783 carrying RP4 and either plasmid pNVgpf (Control; C) or pNeae-IB10 (IB10), plus either EcM1-NL-intEHEC, constitutively expressing the full-length Intimin from EHEC (A) or the indicated EHEC mutant strain: *etp*, *etk* (B) or *wzy*- (C) with or without carrying pSA10\_GrIA-6his to express GrIA (GrIA<sup>+</sup>) upon addition of 0.02 mM IPTG.

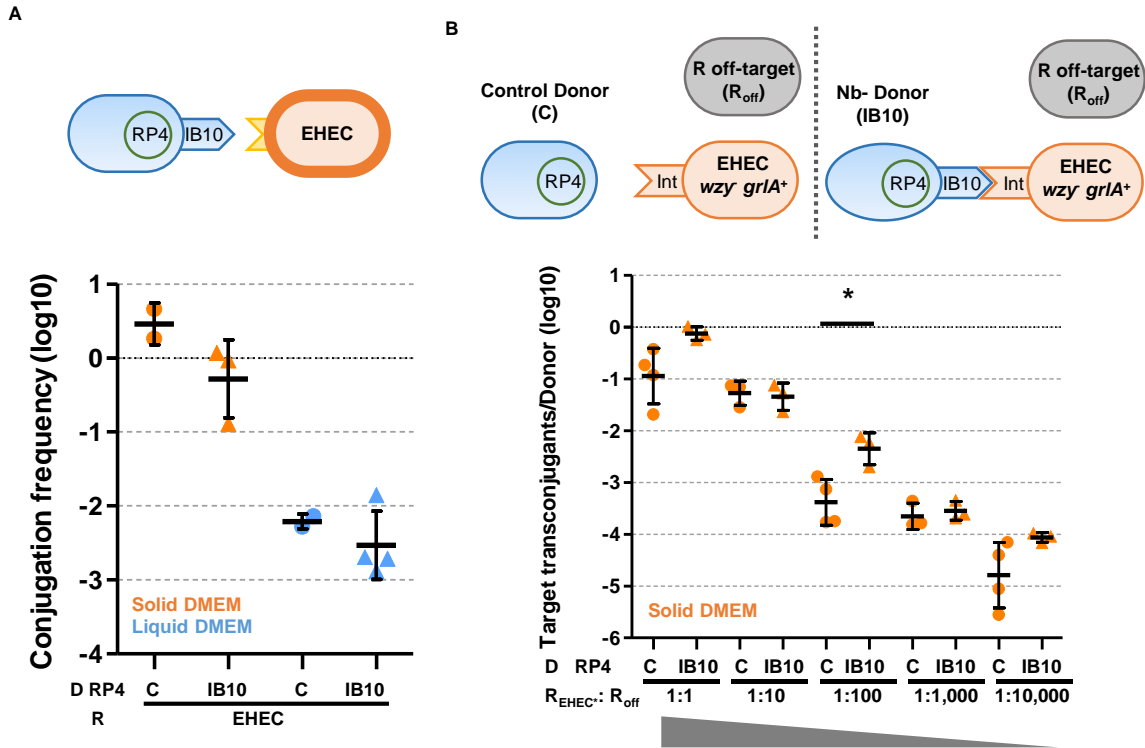

**Fig. S9. IB10-expressing donors do not increase CFs to wt capsulated EHEC (A) but allow targeted conjugation to uncapsulated EHEC on solid surfaces (B).** Mating schemes and CFs (T/D) of plasmid RP4 shown in logarithmic scale after grown 2 h in DMEM media at 37 °C and 5% CO<sub>2</sub>. **(A)** Donor were carrying RP4 plus either pNVgpf (Control; C) or pNae-IB10 (IB10). Recipients were wild type EHEC. **(B)** Donor were *E. coli* BW27783 cells carrying RP4 and either pNVgpf (Control; C) or pNae-IB10 (IB10), expressing the IB10 Nb anti-Intimin (from EHEC) upon induction with 0.1 mM IPTG. Recipient cells were a mixture of target EHEC *wzy grlA*<sup>+</sup> (R<sub>EHEC</sub><sup>+</sup>), and off-target BW27783 cells (R<sub>off</sub>). Donor, EHEC and non-target recipient cells were previously grown overnight without shaking and mixed at the indicated R<sub>EHEC</sub>:R<sub>off</sub> recipient ratios, decreasing the proportion of R<sub>EHEC</sub><sup>+</sup> cells (donor and non-target control cells were always at a 1:1 proportion). \*p < 0.05, by unpaired Student's t-test.

**Table S1. *E. coli* strains used in this study**

| Name                  | Relevant Characteristics                                                                                                                                                                                                                                                                    | Source             |
|-----------------------|---------------------------------------------------------------------------------------------------------------------------------------------------------------------------------------------------------------------------------------------------------------------------------------------|--------------------|
| DH10B-T1R             | (F- $\lambda$ -) <i>mcrA</i> $\Delta$ <i>mrr-hsdRMS-mcrBC</i> $\phi$ 80 <i>lacZDM15</i> $\Delta$ <i>lacX74</i><br><i>recA1 endA1 araD139</i> $\Delta$ ( <i>ara, leu</i> )7697 <i>galU galK rpsL</i><br>( <i>StrR</i> ) <i>nupG tonA</i>                                                     | Novagen            |
| BW25141               | (F- $\lambda$ -) $\Delta$ ( <i>araD-araB</i> )567 $\Delta$ <i>lacZ4787</i> (:: <i>rrnB-3</i> ) $\Delta$ ( <i>phoB-phoR</i> )580 <i>galU95</i> $\Delta$ <i>uidA3::pir</i> <i>recA1 endA9</i> ( <i>delins</i> ):: <i>FRT</i><br><i>rph-1</i> , $\Delta$ ( <i>rhaD-rhaB</i> )568 <i>hsdR51</i> | (1)                |
| MG1655                | K-12 (F- $\lambda$ -)                                                                                                                                                                                                                                                                       | (2)                |
| EcM1                  | MG1655 $\Delta$ <i>fimA-H</i>                                                                                                                                                                                                                                                               | (3)                |
| EcM1TirMA             | EcM1 $\Delta$ <i>flu::P<sub>N25</sub>-TirM-C-EhaA</i> [ <i>pelB-TirM<sub>EHEC</sub>-E-tag-EhaA</i> (989-1327)]                                                                                                                                                                              | This work          |
| EcM1SAgfp             | EcM1 $\Delta$ <i>flu::P<sub>N25</sub>-SAgfp</i> [IntiminEHEC (1-654)-E-Vgfp-myc-tag]                                                                                                                                                                                                        | (4)                |
| EcM1SAtir             | EcM1 $\Delta$ <i>flu::P<sub>N25</sub>-SATir</i> [IntiminEHEC (1-654)-E-Vtir1-myc-tag]                                                                                                                                                                                                       | (4)                |
| EcM1-NL-intEHEC       | EcM1 $\Delta$ <i>lacIZ</i> $\Delta$ <i>flu::lac<sup>f</sup>-Ptac-eae</i> (intiminEHEC 1-934)- <i>aac(3)IV</i> (Apra <sup>R</sup> )                                                                                                                                                          | This work          |
| BW27783               | <i>lac<sup>f</sup> rrnB3</i> $\Delta$ <i>lacZ4787 hsdR514</i> $\Delta$ ( <i>araBAD</i> )56<br>7 $\Delta$ ( <i>rhaBAD</i> )568                                                                                                                                                               | (5)                |
| BWmKate2              | BW27783-Nx <sup>R</sup> attTn7:: P <sub>lac</sub> -mKate2. Km <sup>R</sup>                                                                                                                                                                                                                  | R. Fernández-López |
| EHEC stx <sup>-</sup> | EHEC O157:H7 <i>stx1<sup>-</sup> stx2<sup>-</sup></i> mutant of strain EDL933 (TUV93-0)                                                                                                                                                                                                     | (6)                |
| EHEC wzy              | EDL933 <i>stx wzy::mini-Tn5kan2</i> (SK2526)                                                                                                                                                                                                                                                | (6)                |
| EHEC etp <sup>-</sup> | EDL933 <i>stx<sup>-</sup> <math>\Delta</math>etp::cm</i> (SK2235)                                                                                                                                                                                                                           | (6)                |
| EHEC etk <sup>-</sup> | EDL933 <i>stx<sup>-</sup> <math>\Delta</math>etk::kan</i> (SK1416)                                                                                                                                                                                                                          | (6)                |

**Table S2. Plasmids used in this study.**

| <b>Name</b>         | <b>Relevant Characteristics</b>                                                                                                 | <b>Source</b> |
|---------------------|---------------------------------------------------------------------------------------------------------------------------------|---------------|
| pAK-Not             | Cm <sup>R</sup> , pBR322-ori, lacIq-Plac                                                                                        | (7)           |
| pNeae2              | Cm <sup>R</sup> , pAK-Not derivative with intimin Neae fragment [IntiminEHEC (1-654)-E-His-myc-tag]                             | (8)           |
| pNVgfp              | Cm <sup>R</sup> , pNeae2-derivative with Nb anti-GFP SAgfp [IntiminEHEC (1-654)-E-Vgfp-myc-tag]                                 | (8)           |
| pNVtir1             | Cm <sup>R</sup> , pNeae2-derivative with Nb anti-TirMEHEC SATir [IntiminEHEC (1-654)-E-Vtir1-myc-tag]                           | (8)           |
| pNeae-IB10          | Cm <sup>R</sup> , pNeae2-derivative with Nb anti-int280EHEC [IntiminEHEC (1-654)-E-VIB10-myc-tag]                               | This work     |
| pHEA                | Cm <sup>R</sup> , pAK-Not derivative; His-tagged C-EhaA [pelB-His-E-tag-EhaA(989-1327)]                                         | (9)           |
| pTirMA              | Cm <sup>R</sup> , pHEA derivative with TirM (residues 250-352 of EHEC Tir) fused to C-EhaA [pelB-TirMEHEC-E-tag-EhaA(989-1327)] | This work     |
| pGE                 | Km <sup>R</sup> ; R6K-ori, muticloning site and I-SceI sites                                                                    | (4)           |
| pGEflu              | Km <sup>R</sup> , pGE with homology regions (HRs) flanking flu gene                                                             | (4)           |
| pGEfluSAgfp         | Km <sup>R</sup> , pGEflu with PN25-SAgfp [IntiminEHEC (1-654)-E-Vgfp-myc-tag]                                                   | (4)           |
| pGEfluSATir         | Km <sup>R</sup> , pGEflu with PN25-SATir [IntiminEHEC (1-654)-E-Vtir1-myc-tag]                                                  | (4)           |
| pGEfluTirMA         | Km <sup>R</sup> , pGEflu HRs and PN25-TirMA [IntiminEHEC (1-654)-E-Vtir1-myc-tag]                                               | This work     |
| pGETS               | Km <sup>R</sup> ; pSC101-ts ori, multicloning site and I-SceI sites                                                             | (10)          |
| pGERecombTS-intEHEC | Km <sup>R</sup> , Apra <sup>R</sup> , pGETS, C-intimin, flu HR, aac(3)IV                                                        | This work     |
| pSA10_GrIA-6xhis    | Amp <sup>R</sup> , pBR322 derivative, Plac-GrIA                                                                                 | (11)          |
| pRL443 (RP4)        | Conjugative. IncP1 $\alpha$ ; MOB P11; MPFT. RP4 derivative lacking Km <sup>R</sup> gene.                                       | (12)          |

|                  |                                                                                       |            |
|------------------|---------------------------------------------------------------------------------------|------------|
| pAR106           | Conjugative. IncP1 $\alpha$ ; RP4 derivative with a istAB-aph insertion carrying gfp. | E. Zechner |
| pKM101           | Conjugative, IncN; MOB11; MPFT                                                        | (13)       |
| R388             | Conjugative, IncW; MOB11; MPFT                                                        | (14)       |
| R388 <i>trwJ</i> | R388 carrying a Tn5tac1 insertion mutation in <i>trwJ</i> (pSU4136)                   | (15)       |
| R1               | Conjugative, IncFII; MOB12; MPFF                                                      | (12)       |
| R1drd-19         | Conjugative, IncFII; MOB12; MPFF                                                      | (16)       |
| RSF1010          | Plasmid mobilizable by pRL443 (RP4)                                                   | (17)       |

Inc, incompatibility group (18). MOB, MOB group (19). MPF, mating pair formation (20).

**Table S3. List of primers used in this study.**

| <b>Name</b>         | <b>Sequence (5'-3')*</b>                                                                        | <b>Purpose</b>                                                      |
|---------------------|-------------------------------------------------------------------------------------------------|---------------------------------------------------------------------|
| F_SfiI_TirM         | CTCGCGGCCAGCCGGCCAGGC<br>GCTTGCATTGACGCC                                                        | Cloning of TirM                                                     |
| R_NotI_TirM         | CCGCAGCGGCCCGATGAACT<br>TTCAGCTCCTCCTGG                                                         | Cloning of TirM                                                     |
| 5' XhoI HR          | CATTTCTCGAGGGATGATAGTGCA<br>TTACGCAGTCAGG                                                       | Cloning of C-ter intimin                                            |
| 3' SpeI HindIII int | GCTGAACTAGTAAGCTT<br>TTCTACACAAACCGCATAGACATT<br>TGG                                            | Cloning of C-ter intimin                                            |
| 5' HindIII FRT Apra | CCAGAAGCTTGAAGTTCCTATTCC<br>GAAGTTCCTATTCTCTAGAAAGTAT<br>AGGAACTTCTGCAGCTCACGGTAA<br>CTGATGCCG  | Cloning of apramycin resistant cassette                             |
| 3' SpeI FRT Apra    | GGAAACTAGTGAAGTTCCTATACT<br>TTCTAGAGAATAGGAACTTCGGAA<br>TAGGAACTTCGGAATAGGAACTTA<br>TGAGCTCAGCC | Cloning of apramycin resistant cassette                             |
| VHH-SfiI2           | GTCCTCGCAACTGCGGCCAGCC<br>GGCCATGGCTCAGGTGCAGCTGG<br>TGGA                                       | Cloning of Nb IB10                                                  |
| VHH-NotI2           | GGACTAGTGCGCCGCTGAGGAG<br>ACGGTGACCTGGGT                                                        | Cloning of Nb IB10                                                  |
| F_flu_int           | CGGTTACAGGCAATTGGCGGTAT<br>TGTTAAC                                                              | Confirmation of cassette integration in <i>flu</i> locus            |
| Int_EHEC_seq        | CAGACATCTAGTGAGCAGCGTTCT<br>GG                                                                  | Confirmation of full-length intimin integration in <i>flu</i> locus |
| 3' flu genome       | GAAGCTGATGATCATTCCGGCAAT<br>C                                                                   | Confirmation of full-length intimin integration in <i>flu</i> locus |

**Table S4. Tir-anchored CFs of conjugative plasmids RP4 and R388 increase with time.** Conjugation frequencies (CFs) are expressed as fold increased relative to control.

| Plasmid | Inc         | Pilus | MOB | Time | CF Fold increase |           |
|---------|-------------|-------|-----|------|------------------|-----------|
|         |             |       |     |      | Solid            | Liquid    |
| RP4     | P1 $\alpha$ | Rigid | F11 | 1 h  | 1.03             | 67.40***  |
|         |             |       |     | 2 h  | 1.08             | 151.90*** |
| R388    | W           | Rigid | F11 | 1 h  | 2.40             | 7.50***   |
|         |             |       |     | 2 h  | 4.04             | 29.74***  |

Inc, incompatibility group. MOB, MOB group. \*\*\*p < 0.001, by unpaired Student's t-test.

## References

1. K. A. Datsenko, B. L. Wanner, One-step inactivation of chromosomal genes in *Escherichia coli* K-12 using PCR products. *Proc Natl Acad Sci U S A* **97**, 6640-6645 (2000).
2. F. R. Blattner *et al.*, The complete genome sequence of *Escherichia coli* K-12. *Science* **277**, 1453-1462 (1997).
3. I. C. Blomfield, M. S. McClain, B. I. Eisenstein, Type 1 fimbriae mutants of *Escherichia coli* K12: characterization of recognized afimbriate strains and construction of new fim deletion mutants. *Mol Microbiol* **5**, 1439-1445 (1991).
4. C. Piñero-Lambea *et al.*, Programming controlled adhesion of *E. coli* to target surfaces, cells, and tumors with synthetic adhesins. *ACS Synth Biol* **4**, 463-473 (2015).
5. A. Khlebnikov, K. A. Datsenko, T. Skaug, B. L. Wanner, J. D. Keasling, Homogeneous expression of the P(BAD) promoter in *Escherichia coli* by constitutive expression of the low-affinity high-capacity AraE transporter. *Microbiology* **147**, 3241-3247 (2001).
6. Y. Shifrin *et al.*, Transient shielding of intimin and the type III secretion system of enterohemorrhagic and enteropathogenic *Escherichia coli* by a group 4 capsule. *J Bacteriol* **190**, 5063-5074 (2008).
7. E. Veiga, V. de Lorenzo, L. A. Fernández, Probing secretion and translocation of a beta-autotransporter using a reporter single-chain Fv as a cognate passenger domain. *Mol Microbiol* **33**, 1232-1243 (1999).
8. V. Salema *et al.*, Selection of single domain antibodies from immune libraries displayed on the surface of *E. coli* cells with two  $\beta$ -domains of opposite topologies. *PLoS One* **8**, e75126 (2013).
9. E. Marín, G. Bodelón, L. Fernández, Comparative analysis of the biochemical and functional properties of C-terminal domains of autotransporters. *J Bacteriol* **192**, 5588-5602 (2010).
10. D. Ruano-Gallego, B. Álvarez, L. Fernández, Engineering the Controlled Assembly of Filamentous Injectisomes in *E. coli* K-12 for Protein Translocation into Mammalian Cells. *ACS Synth Biol* **4**, 1030-1041 (2015).
11. Y. Litvak *et al.*, Epithelial cells detect functional type III secretion system of enteropathogenic *Escherichia coli* through a novel NF- $\kappa$ B signaling pathway. *PLoS Pathog* **13**, e1006472 (2017).
12. J. Elhai, A. Vepritskiy, A. M. Muro-Pastor, E. Flores, C. P. Wolk, Reduction of conjugal transfer efficiency by three restriction activities of *Anabaena* sp. strain PCC 7120. *J Bacteriol* **179**, 1998-2005 (1997).
13. P. J. Langer, W. G. Shanabruch, G. C. Walker, Functional organization of plasmid pKM101. *Journal of bacteriology* **145**, 1310-1316 (1981).
14. N. Datta, R. W. Hedges, Trimethoprim resistance conferred by W plasmids in Enterobacteriaceae. *Journal of general microbiology* **72**, 349-355 (1972).



15. H. D. de Paz *et al.*, Functional interactions between type IV secretion systems involved in DNA transfer and virulence. *Microbiology (Reading)* **151**, 3505-3516 (2005).
16. E. Meynell, N. Datta, Mutant drug resistant factors of high transmissibility. *Nature* **214**, 885-887 (1967).
17. K. M. Derbyshire, G. Hatfull, N. Willetts, Mobilization of the non-conjugative plasmid RSF1010: a genetic and DNA sequence analysis of the mobilization region. *Mol Gen Genet* **206**, 161-168 (1987).
18. D. E. Taylor, A. Gibreel, T. D. Lawley, D. M. Tracz, in *Plasmid Biology*, B. E. Funnel, G. J. Phillips, Eds. (ASM Press, Washington, DC, 2004), chap. 23, pp. 473-491.
19. M. P. Garcillan-Barcia, M. V. Francia, F. de la Cruz, The diversity of conjugative relaxases and its application in plasmid classification. *FEMS microbiology reviews* **33**, 657-687 (2009).
20. J. Guglielmini, L. Quintais, M. P. Garcillan-Barcia, F. de la Cruz, E. P. Rocha, The repertoire of ICE in prokaryotes underscores the unity, diversity, and ubiquity of conjugation. *PLoS genetics* **7**, e1002222 (2011).
